# Supplementary material
Source: PubMed Central journal article supplement (PMC8853335)
Supplement: 40699_2022_4190_MOESM1_ESM.pdf [file 40699_2022_4190_MOESM1_ESM.pdf]

**Supplementary table 1.** Clinical summary of the three cases of recalcitrant subepidermal autoimmune bullous diseases (SABD).

*BP: bullous pemphigoid; CTX: cyclophosphamide; CsA: cyclosporine; DXM: dexamethasone; F: female; HBsAg: surface antigen of type B hepatitis virus; IVIG: intravenous immunoglobulin; M: male; MEP: Methylprednisolone; MTX: methotrexate; TCS: topical corticosteroids;*

*\*H&E showed subepidermal blistering with a dermal eosinophilic cell infiltrate.*

| Case | Sex/Age, year | Duration, month | Clinical manifestation                                                              | Diagnosis and evidence             | Medical comorbidities                                                                                                             | Previous therapies                                  | Treatments before dupilumab                                                                                                                                                      | Response to the treatments before dupilumab                | Usage of dupilumab                                             | Concomitant treatments with dupilumab                                                            | Progress and follow-up after dupilumab                                                                                           |
|------|---------------|-----------------|-------------------------------------------------------------------------------------|------------------------------------|-----------------------------------------------------------------------------------------------------------------------------------|-----------------------------------------------------|----------------------------------------------------------------------------------------------------------------------------------------------------------------------------------|------------------------------------------------------------|----------------------------------------------------------------|--------------------------------------------------------------------------------------------------|----------------------------------------------------------------------------------------------------------------------------------|
| 1    | F/54          | 17              | Itchy, eczematous lesions and blisters with erosion over the trunk and extremities; | SABD: H&E*, DIF#                   | Psychiatric disorder history                                                                                                      | TCS, Prednisone, IVIG, CTX, Doxycycline, Etanercept | TCS, MEP 80 mg/d (equivalent to prednisone 1.5 mg/kg/d), for 1 week followed by DXM 20 mg/d for 2 weeks (equivalent to prednisone 2.5 mg/kg/d), IVIG, CTX 0.2 g every other day  | No response; psychosis progression                         | 600 mg initially followed by 300 mg every other week for twice | TCS, MEP 40 mg/d (equivalent to prednisone 0.75 mg/kg/d), CTX 0.2 g every other day              | Disease clearance within 1 month; Prednisone tapered off over 3 months without disease rebound; psychosis remission;             |
| 2    | M/50          | 3               | Severely itchy, eczematous lesions and blisters over the trunk and extremities;     | BP: H&E*, DIF#, Anti-BP180 IgG (+) | HBsAg (+) with high copies of HBV, Glucocorticoid gene test: high-risk for necrosis of femoral head                               | TCS, Prednisone, IVIG                               | TCS, MEP 80 mg/d (equivalent to prednisone 1.5 mg/kg/d) for 2.5 week →MEP 120 mg/d 3 days (equivalent to prednisone 2.2 mg/kg/d), IVIG, MTX 10 mg weekly, CsA 100 mg twice daily | No response                                                | 600 mg once                                                    | TCS, MEP 120 mg/d (equivalent to prednisone 2.2 mg/kg/d), MTX 10mg weekly, CsA 100mg twice daily | Disease controlled in 1 week; Prednisone tapered to 0.75 mg/kg/d within 2 weeks and to 0.5 mg/kg/d over 2 months without relapse |
| 3    | F/68          | >36             | Itchy blisters with erosion over the trunk and extremities;                         | SABD: H&E*, DIF#                   | Hypertension, Type 2 diabetes mellitus, Stroke, Arrhythmias with sustained atrial fibrillation, HBsAg (+) with high copies of HBV | TCS, Prednisone, IVIG, CTX, MTX, Cyclosporine       | TCS, Prednisone 5-10 mg daily, CTX 100 mg daily                                                                                                                                  | No response; Developing active gastric ulcer with bleeding | 600 mg initially followed by 300 mg every other week for twice | TCS                                                                                              | Improvement of pruritus within 1 week and maintained for 2 months, no improvement in bulla                                       |

*#DIF showing linear deposits of C3 along the dermoepidermal junction.*
